# Supplementary material for: Nanofracture on fused silica microchannel for Donnan exclusion based electrokinetic stacking of biomolecules
Source: Royal Society of Chemistry journal article supplement (doi:10.1039/c2lc40571g), 2012-01-01
Supplement: c2lc40571g.pdf [file c2lc40571g.pdf]

**Supporting info for MS titled:**

**Nanofracture on fused silica microchannel for Donnan exclusion based  
electrokinetic stacking of biomolecules**

Zhi-Yong Wu,<sup>\*a</sup> Cui-Ye Li,<sup>a</sup> Xiao-Li,<sup>a</sup> Guo, Bo Li,<sup>a</sup> Da-Wei Zhang,<sup>a</sup> Ye Xu<sup>b</sup> and Fang Fang<sup>b</sup>

<sup>a</sup>Research Center for Analytical Sciences, Northeastern University, Shenyang, China.

<sup>b</sup>Chemistry Department, Northeastern University, Shenyang, China.

Correspondance: Zhi-Yong Wu, Fax: 86 24 83687659; Tel: 86 24 83687659; E-mail:

zywu\_2008@yahoo.com.cn

**1. Ring-disk fracture Model**

For an electrolyte conductivity cell of parallel square electrodes with an area of  $A$  and distance of  $L$ , the relation of resistance and the conductivity of the electrolyte is expressed as equation s1, as can be find in any physical chemistry book, .

$$R = \frac{L}{A \cdot k} \quad \text{s1}$$

If the cell is consisted of two coaxial ring disks with radius  $r$ , width  $w$  and small distance  $dr$ , then the resistance between the two ring disk electrodes can be expressed as equation 2s.

$$dR = \frac{dr}{2\pi r w k} \quad \text{s2}$$

The resistance of a ring disk fracture can be viewed as the sum of thin ring disk resistors connected in series, hence integration of equation s2 between the inner and outer radius gives the total resistance of the fracture, considering the voltage is applied between inside and outside ring disk electrodes.

$$R_F = \int_{r_i}^{r_o} \frac{dr}{2\pi r w k} \quad \text{s3}$$

Definite integration of equation s3 give equation s4.

$$R_F = \frac{dr}{2\pi r w k} \ln \frac{r_o}{r_i} \quad \text{s4}$$

The fracture width can be calculated with equation s5 if the  $R_F$  is available.

$$w = \frac{1}{2\pi k R_F} \ln \frac{r_o}{r_i} \quad \text{s5}$$

## 2. Measurement of the fracture resistance

The resistance of the fracture was measured by filling the capillary with 1 M KCl solution. First we measure  $R_{1F}$ , sum of resistance of  $R_1$  and  $R_F$ , by applying a voltage between left end reservoir and that of the middle, and then the  $R_{2F}$  in the same manner. The sum of  $R_1$  and  $R_2$  is measured by applying a voltage across the two end reservoirs.

$$R_{1F} = R_1 + R_F, \quad R_{2F} = R_2 + R_F, \quad R_{12} = R_1 + R_2$$

With assumption of the equivalent circuit of the chip system, then  $R_F$  can be calculated according to:

$$R_F = \frac{R_{1F} + R_{2F} - R_{12}}{2}$$

According to equation s5, larger fracture resistance resulted in a narrower fracture width.

## 3. Capillary fractures generated by supersonic generator

Table s1 lists 37 samples generated with supersonic, together with the resistance measurement results. As can be seen that the,  $R_{1F}$  and  $R_{2F}$  is quite close to each other. The small difference in  $R_{12}$  is due to length difference and room temperature changes. Fig.1S is the statistic of the fracture width. The SEM insert clearly shows that the fracture is about 83 nm, which is in agreement with the resistance measurement. As can be seen from the statistics that most fractures has a width of below 250 nm, only one case over 332 nm.

**Table 1S.** Summary of the resistance / K $\Omega$

| No | $R_{1F}$ | $R_{2F}$ | $R_{12}$ | $R_F$ | w/nm |
|----|----------|----------|----------|-------|------|
|----|----------|----------|----------|-------|------|

---

|     |      |      |     |      |     |
|-----|------|------|-----|------|-----|
| 1*  | 339  | 345  | 547 | 68   | 208 |
| 2*  | 318  | 358  | 547 | 64   | 221 |
| 3*  | 388  | 383  | 543 | 114  | 125 |
| 4   | 403  | 406  | 690 | 59   | 245 |
| 5   | 440  | 434  | 675 | 99   | 146 |
| 6   | 414  | 429  | 666 | 88   | 165 |
| 7   | 402  | 396  | 662 | 68   | 213 |
| 8   | 1236 | 1154 | 696 | 847  | 17  |
| 9   | 477  | 459  | 694 | 121  | 118 |
| 10  | 425  | 417  | 688 | 76   | 186 |
| 11  | 734  | 719  | 701 | 375  | 37  |
| 12  | 547  | 545  | 695 | 198  | 70  |
| 13  | 718  | 685  | 722 | 701  | 21  |
| 14  | 757  | 776  | 711 | 410  | 37  |
| 15  | 670  | 668  | 625 | 356  | 41  |
| 16  | 386  | 382  | 635 | 66   | 218 |
| 17  | 402  | 407  | 622 | 93   | 156 |
| 18  | 391  | 382  | 616 | 78   | 186 |
| 19  | 436  | 418  | 658 | 97   | 149 |
| 20  | 751  | 735  | 658 | 414  | 38  |
| 21  | 1116 | 1113 | 668 | 780  | 21  |
| 22  | 576  | 578  | 643 | 256  | 62  |
| 23  | 1465 | 1543 | 663 | 1504 | 11  |
| 24  | 1410 | 1448 | 676 | 1090 | 15  |
| 25  | 772  | 789  | 735 | 412  | 37  |
| 26  | 572  | 564  | 714 | 211  | 73  |
| 27  | 926  | 1030 | 746 | 605  | 26  |
| 28  | 714  | 769  | 718 | 382  | 40  |
| 29  | 522  | 524  | 735 | 155  | 99  |
| 30  | 564  | 598  | 729 | 581  | 27  |
| 31* | 308  | 299  | 521 | 43.  | 332 |

|      |     |     |     |      |     |
|------|-----|-----|-----|------|-----|
| 32*  | 393 | 368 | 535 | 113  | 127 |
| 33*  | 318 | 358 | 547 | 64.5 | 221 |
| 34 * | 365 | 361 | 533 | 963  | 156 |
| 35   | 442 | 436 | 698 | 89.8 | 129 |
| 36   | 403 | 406 | 685 | 62.0 | 243 |
| 37   | 407 | 410 | 633 | 92.3 | 157 |

Note: All capillaries are 5 cm long, except those marked with\* that are 4 cm long. 1 M KCl was filled in the chip system, and the resistance measurement was conducted at room temperature. The fractures were generated by supersonic at 40 Hz for 3 sec.

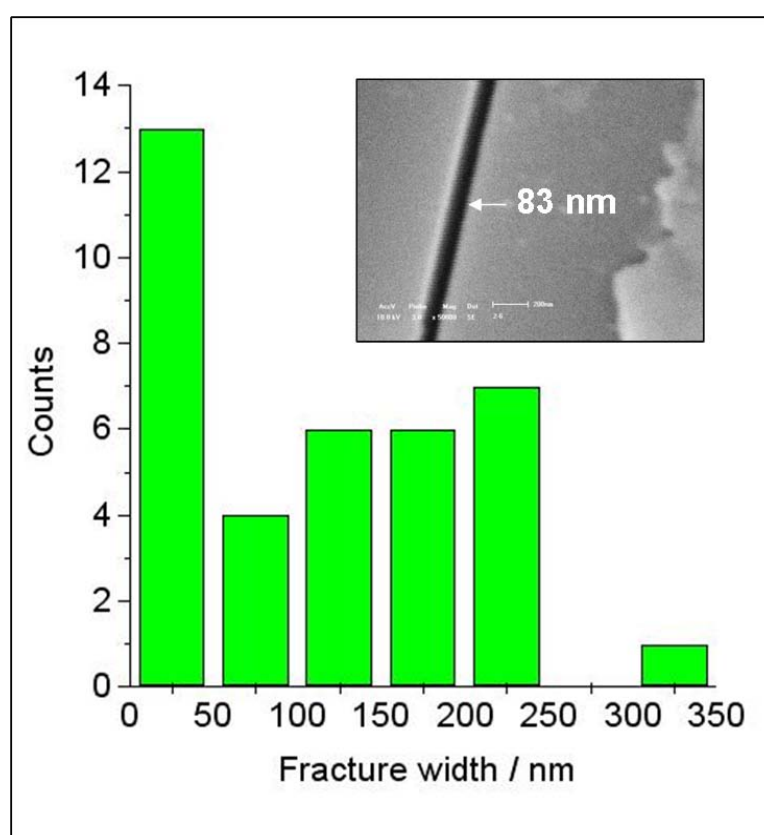

**Fig.1S.** Statistics of nanofracture generated by ultrasonic, 40 Hz for 3 s. Insert is a SEM of a fracture sample, the scale bar in SEM picture is 200 nm.

#### 4. Current development during stacking

Current development of 2 chips is shown in Fig.2s. As can be seen, that both chip showed current increase by time, and reached the highest level after 1000 s, and a trend of decreasing was noticed for the chip with 118 nm fracture.

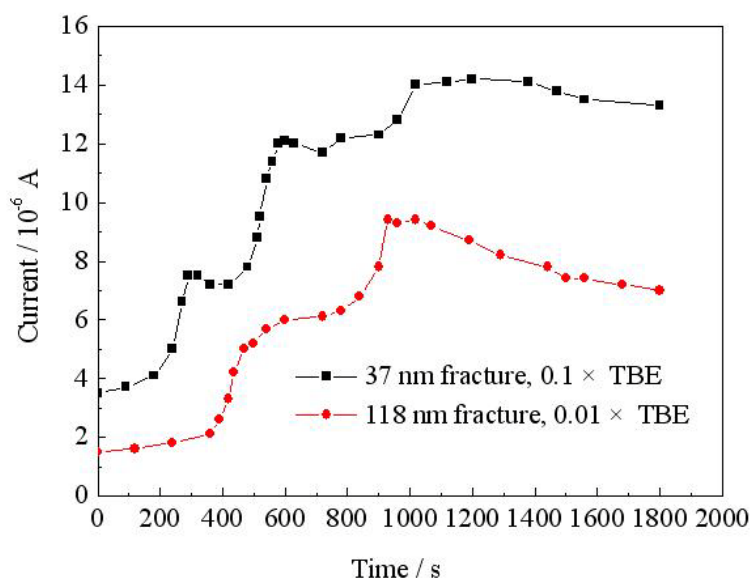

**Fig.2s.** current development for two chips with different buffer concentrations.

## 5. Comparison of a capillary fracture interface with and a nanochannel

The ring-disk nanofluidic channel formed on a capillary of 100  $\mu\text{m}$  id and 360  $\mu\text{m}$  od, height  $w$ , length  $l = 80 \mu\text{m}$ ; a square nanochannel of the same height  $h$ , typically  $h=5 \mu\text{m}$  wide, and also 80  $\mu\text{m}$  long. Both filled with the same electrolyte with conductivity of  $k$ . According to equation S1 and S3, the ratio of resistance can be expressed as

$$\frac{R_n}{R_F} = \frac{2\pi \cdot l}{h} \ln \frac{r_i}{r_o}$$

The calculated result is about 78.

## 6. Note on the video clip

A piece of video is provided, which corresponds to 3.2 ng/ $\mu\text{L}$  DNA sample in 0.01 M TBE buffer with 0.6 $\times$ SYBR Green I, 5 cm capillary with 118 nm fracture, voltage 300 V. With blue light excitation, green fluorescence zone was clearly observed inside the capillary at the fracture.
